# Supplementary material
Source: MDPI journal article supplement (https://www.mdpi.com/2071-1050/13/22/12497)
Supplement: s1 [file s1]

**Table S1.** Contrast table of the contribution of individual plant species to the overall Bray-Curtis dissimilarity of species composition between sites (ANS and NNS). Av. dis. – Average dissimilarity; SD – Standard deviation; Av Com1 – Average Community 1; Av Com2 – Average community 2; Cum. – Cumulative; Cont. – Contribution.

|                          | Av dis | SD  | Ratio | Av Com1 | Av Com2 | Cum | Cum % | Cont % |
|--------------------------|--------|-----|-------|---------|---------|-----|-------|--------|
| Sibbaldia.cuneata        | 0.1    | 0.0 | 2.0   | 1.8     | 9.4     | 0.1 | 9.2   | 9.2    |
| Poa.annua                | 0.0    | 0.0 | 1.6   | 9.2     | 5.8     | 0.2 | 17.1  | 7.9    |
| Abies.pindrow            | 0.0    | 0.0 | 2.9   | 16.5    | 10.3    | 0.3 | 25.0  | 7.9    |
| Impatiens.brachycentra   | 0.0    | 0.0 | 1.7   | 5.0     | 1.5     | 0.3 | 30.1  | 5.0    |
| Rumex.nepalanse          | 0.0    | 0.0 | 2.0   | 0.3     | 3.4     | 0.3 | 34.0  | 3.9    |
| Polygonum.aviculare      | 0.0    | 0.0 | 1.6   | 0.0     | 2.8     | 0.4 | 37.4  | 3.4    |
| Polygonum.amplexicaule   | 0.0    | 0.0 | 0.7   | 0.2     | 2.5     | 0.4 | 40.8  | 3.3    |
| Plantago.lanceolata      | 0.0    | 0.0 | 1.1   | 0.4     | 2.7     | 0.4 | 43.9  | 3.2    |
| Trifolium.repens         | 0.0    | 0.0 | 1.0   | 1.3     | 2.5     | 0.5 | 46.9  | 2.9    |
| Fragarai.nubicola        | 0.0    | 0.0 | 1.4   | 3.3     | 2.3     | 0.5 | 49.8  | 2.9    |
| Mentha.longifolia        | 0.0    | 0.0 | 1.2   | 0.0     | 2.4     | 0.5 | 52.6  | 2.8    |
| Veronica.laxa            | 0.0    | 0.0 | 1.3   | 1.8     | 1.9     | 0.6 | 55.3  | 2.7    |
| Viola.biflora            | 0.0    | 0.0 | 1.2   | 2.2     | 0.9     | 0.6 | 57.8  | 2.5    |
| Impatiens.thomsonii      | 0.0    | 0.0 | 1.8   | 1.3     | 1.9     | 0.6 | 60.2  | 2.4    |
| Cirsium.falconeri        | 0.0    | 0.0 | 2.0   | 1.4     | 1.8     | 0.6 | 62.4  | 2.2    |
| Galium.palustre          | 0.0    | 0.0 | 1.0   | 1.8     | 0.2     | 0.6 | 64.4  | 2.0    |
| Achillea.millefolium     | 0.0    | 0.0 | 1.0   | 1.7     | 0.6     | 0.7 | 66.3  | 1.9    |
| Viburnum.grandiflorum    | 0.0    | 0.0 | 2.0   | 5.8     | 4.3     | 0.7 | 68.2  | 1.9    |
| Erodium.cicutarium       | 0.0    | 0.0 | 0.8   | 0.0     | 1.4     | 0.7 | 69.9  | 1.8    |
| Urtica.dioica            | 0.0    | 0.0 | 1.6   | 0.0     | 1.3     | 0.7 | 71.5  | 1.6    |
| Sambucus.wightiana       | 0.0    | 0.0 | 2.7   | 0.3     | 1.5     | 0.7 | 72.9  | 1.4    |
| Iris.nepalensis          | 0.0    | 0.0 | 1.6   | 1.2     | 0.0     | 0.7 | 74.3  | 1.4    |
| Euphorbia.wallichii      | 0.0    | 0.0 | 0.9   | 1.2     | 0.0     | 0.8 | 75.7  | 1.4    |
| Senecio.chrysanthemoides | 0.0    | 0.0 | 1.4   | 1.6     | 1.4     | 0.8 | 77.0  | 1.3    |
| Asplenium.ofeliae        | 0.0    | 0.0 | 1.1   | 0.6     | 0.8     | 0.8 | 78.2  | 1.2    |
| Poa.palustris            | 0.0    | 0.0 | 1.6   | 1.0     | 0.0     | 0.8 | 79.4  | 1.2    |
| Cerastium.cerastoides    | 0.0    | 0.0 | 2.5   | 1.2     | 0.3     | 0.8 | 80.5  | 1.1    |
| Prunella.vulgaris        | 0.0    | 0.0 | 1.4   | 1.1     | 0.3     | 0.8 | 81.7  | 1.1    |
| Ranunculus.hirtus        | 0.0    | 0.0 | 2.0   | 1.3     | 0.4     | 0.8 | 82.8  | 1.1    |
| Thymus.linearis          | 0.0    | 0.0 | 1.0   | 0.8     | 0.3     | 0.8 | 83.8  | 1.1    |
| Clinopodium.umbrosum     | 0.0    | 0.0 | 0.9   | 0.9     | 0.0     | 0.8 | 84.9  | 1.1    |
| Oxalis.corniculata       | 0.0    | 0.0 | 0.6   | 0.9     | 0.0     | 0.9 | 86.0  | 1.1    |
| Chaerophyllum.villosum   | 0.0    | 0.0 | 1.2   | 0.8     | 0.0     | 0.9 | 87.1  | 1.1    |
| Caltha.palustris         | 0.0    | 0.0 | 1.6   | 0.8     | 0.0     | 0.9 | 88.1  | 1.0    |
| Mosotis.arvensis         | 0.0    | 0.0 | 1.4   | 1.3     | 0.5     | 0.9 | 89.1  | 0.9    |
| Rosa.webbiana            | 0.0    | 0.0 | 1.7   | 0.8     | 0.0     | 0.9 | 90.0  | 0.9    |
| Cardamine.impatiens      | 0.0    | 0.0 | 1.5   | 0.8     | 0.0     | 0.9 | 90.9  | 0.9    |

|                          |     |     |     |     |     |     |       |     |
|--------------------------|-----|-----|-----|-----|-----|-----|-------|-----|
| Taraxacum.officinale     | 0.0 | 0.0 | 0.9 | 0.0 | 0.8 | 0.9 | 91.7  | 0.9 |
| Capsella.bursa.pastoris  | 0.0 | 0.0 | 0.9 | 0.0 | 0.7 | 0.9 | 92.6  | 0.8 |
| Cardamine.hirsuta        | 0.0 | 0.0 | 1.6 | 0.0 | 0.7 | 0.9 | 93.4  | 0.8 |
| Malva.neglecta           | 0.0 | 0.0 | 0.9 | 0.0 | 0.5 | 0.9 | 94.1  | 0.7 |
| Arisaema.jacquemontii    | 0.0 | 0.0 | 1.2 | 0.5 | 0.0 | 0.9 | 94.7  | 0.6 |
| Docus.carota             | 0.0 | 0.0 | 0.8 | 0.0 | 0.5 | 1.0 | 95.3  | 0.6 |
| Caltha.abla              | 0.0 | 0.0 | 0.7 | 0.0 | 0.4 | 1.0 | 95.9  | 0.6 |
| Pinus.wallichiana        | 0.0 | 0.0 | 2.2 | 0.5 | 0.3 | 1.0 | 96.3  | 0.5 |
| Corydalis.govaniana      | 0.0 | 0.0 | 0.8 | 0.3 | 0.0 | 1.0 | 96.8  | 0.4 |
| Podophyllum.hexandrum    | 0.0 | 0.0 | 1.0 | 0.3 | 0.0 | 1.0 | 97.2  | 0.4 |
| Equisetum.arvense        | 0.0 | 0.0 | 0.6 | 0.3 | 0.0 | 1.0 | 97.6  | 0.4 |
| Prunus.cornuta           | 0.0 | 0.0 | 1.6 | 0.3 | 0.0 | 1.0 | 97.9  | 0.3 |
| Asyneuma.thomsonii       | 0.0 | 0.0 | 0.9 | 0.3 | 0.0 | 1.0 | 98.2  | 0.3 |
| Aconitum.chasmanthum     | 0.0 | 0.0 | 0.9 | 0.3 | 0.0 | 1.0 | 98.5  | 0.3 |
| Epilobium.royleanum      | 0.0 | 0.0 | 0.9 | 0.3 | 0.0 | 1.0 | 98.8  | 0.3 |
| Actaea.spicata.L.        | 0.0 | 0.0 | 0.6 | 0.3 | 0.0 | 1.0 | 99.1  | 0.3 |
| Potentilla.atrosanguinea | 0.0 | 0.0 | 0.9 | 0.0 | 0.3 | 1.0 | 99.4  | 0.3 |
| Arabidopsis.thaliana     | 0.0 | 0.0 | 1.0 | 0.2 | 0.0 | 1.0 | 99.6  | 0.2 |
| Primula.macrophylla      | 0.0 | 0.0 | 1.0 | 0.2 | 0.0 | 1.0 | 99.8  | 0.2 |
| Aquilegia.fragrans       | 0.0 | 0.0 | 0.6 | 0.2 | 0.0 | 1.0 | 100.0 | 0.2 |

---
